# Supplementary material
Source: Elsevier journal article supplement (https://www.sciencedirect.com/science/article/pii/S2173574314001026)
Supplement: mmc1 [file S2173574314001026:mmc1.pdf]

## **Anexo 1** Cuestionario creado 'ad hoc' para el estudio sobre Fibromialgia.

### **ENCUESTA FIBROMILGIA**

#### **Preguntas Pre-.**

1. Valora de 0 a 10 su calidad de vida.

1   2   3   4   5   6   7   8   9   10

2. ¿Cuánto le incapacita el dolor en la realización de movimientos en su vida diaria?

Bastante                      Mucho      Poco                      Nada

3. ¿Conoce qué es la Terapia Ocupacional y el papel que desempeña en la fibromialgia?

Bastante                      Mucho      Poco                      Nada

4. ¿En alguna ocasión ha sido tratado desde la disciplina de Terapia Ocupacional?

Si      No              No sé

5. ¿Considera que la sanidad pública les ayuda?

Bastante                      Mucho      Poco                      Nada

6. Valora de 0 a 10 a su médico de cabecera.

1   2   3   4   5   6   7   8   9   10

7. Valora de 0 a 10 a su médico reumatólogo.

1   2   3   4   5   6   7   8   9   10

8. ¿Quién considera que es la persona que más la comprende?

9. ¿Considera que el sistema sanitario cubre todas sus necesidades?

10. ¿Conoces Terapia Ocupacional?

Si                      No

11 ¿Sabes que es psicomotricidad?

Si                      No

12 ¿Crees que te puede ayudar nuestra intervención en tu enfermedad?

Si                      No

13 ¿Encuentra mejoría con el tratamiento recibido actualmente?

Si No

14 ¿Cree que el resto de la gente de toma en serio su enfermedad?

Siempre Casi siempre A veces Casi nunca Nunca

15 ¿Cree que los médicos toman en serio todos los síntomas que padece?

Siempre Casi siempre A veces Casi nunca Nunca

### Preguntas Post

- Tras conocer qué es la intervención multidisciplinar, ¿considera necesaria la intervención de un terapeuta ocupacional en su tratamiento?

Si No

- ¿Cree usted que debería de haber un terapeuta ocupacional en Atención Primaria?

Si No

- Valora del 0 a 10 la intervención realizada desde la psicomotricidad en Terapia Ocupacional.

1 2 3 4 5 6 7 8 9 10

- ¿Le ha quedado claro que es Terapia Ocupacional?

Si No

- ¿Y que es psicomotricidad?

Si No

- ¿Crees que te ha ayudado nuestra intervención?

Si No

- ¿Cree que se debería incluir nuestra intervención dentro de su tratamiento?

Si No

- ¿Qué habéis mejorado después de nuestra intervención?

- ¿Cree que ha mejorado su calidad de vida?

Bastante Mucho Poco Nada

- ¿Cree que el tratamiento ofrecido le ha mejorado? ¿por qué?

## Anexo 2. Descripción sesiones Terapia Ocupacional.

### ESTRUCTURACIÓN DE SESIONES

- a) **Sesión 1:** Presentación Terapia Ocupacional +Psicomotricidad 1
- b) **Sesión 2:** Psicomotricidad 2
- c) **Sesión 3:** Piscina (Psicomotricidad acuática).
- d) **Sesión 4:** Psicomotricidad.
- e) **Sesión 5:** Reestructuración del desempeño ocupacional y actividad graduada.
- f) **Sesión 6:** Intervención en actividades de la vida diaria y actividad física.
- g) **Sesión 7:** Ejercicio aire libre

Cada sesión tendrá una duración aproximada de: 60 min a 120 min (según sesión).

|                                                 |
|-------------------------------------------------|
| <b>SESIÓN 1: PRESENTACIÓN Y PSICOMOTRICIDAD</b> |
|-------------------------------------------------|

#### Objetivos:

- Dar a conocer que es la psicomotricidad y los beneficios que tiene en FM.
- Promover la creación de un grupo y favorecer las relaciones sociales.
- Aumentar la confianza entre ellas para favorecer la participación colectiva en las sesiones.
- Promover la adhesión al tratamiento.

**Duración:** 40 minutos

**Lugar:** Sala de centro de salud "La Solana"

**Material:** Sillas.

Para comenzar la sesión se seguirá un orden establecido de:

1. **Presentación** de lo que vamos a hacer. Se solicitará que traigan música que les guste.

Tiempo: 15 minutos

2. **Calentamiento** con música de todas las articulaciones del cuerpo (desde los tobillos hasta la cabeza). Seremos conscientes de los movimientos de nuestras articulaciones e iremos pensando en voz baja "estoy moviendo mi tobillo derecho". Nota: en función de la gravedad se optará por calentamiento en silla o de pie.

**Tiempo estimado: 15-20 minutos**

3. Descanso. 2-3 min

4. Ejercicios:

4.1. **Saludos:** Nos movemos por toda la sala y suponemos que estamos en una celebración y vamos saludando a todas las de la sala, teneis que conocer de ellas lo que queráis.

**4.2. Parejas.**

- Por parejas vamos a andar por la sala al ritmo de la música.

- Después de la orden que dé el TO se hará lo que diga, por ejemplo:

o MANO CON MANO.

o ESPALDA CON ESPALDA.

o PECHO CON PECHO.

o FRENTE CON FRENTE.

Relajación e impresiones de la sesión (mediante respiraciones): Se plasmaran en un folio las impresiones de cada sesión. Video final: <http://www.psicomotricidad.com.ar/2011/04/indefinida-plural-documental-sobre.html>

## SESIÓN 2: PSICOMOTRICIDAD

**Objetivos:**

- ✓ Mejorar la capacidad de adaptación a nuevas situaciones a pesar de sus restricciones.
- ✓ Favorecer las relaciones sociales.
- ✓ Contribuir a mejorar la salud, aumentando la calidad de vida.
- ✓ Promover adhesión al tratamiento.

**Duración:** 45 minutos.

**Lugar:** Sala de centro de salud “La Solana”.

**Material:** Sillas, pelotas

1. **Calentamiento:** con música movemos todas las articulaciones del cuerpo (desde los tobillos hasta la cabeza). Seremos conscientes de los movimientos de nuestras articulaciones e iremos pensando en voz baja “estoy moviendo mi tobillo derecho”.

Nota: en función de la gravedad se optara por calentamiento en silla o de pie.

Tiempo estimado: 15 min.

2. **Descanso:** 2-3 min

### 3. Ejercicios:

3.1. Pelota: Una primera ronda en la que cada una dice su nombre. Y a continuación una segunda ronda en la que dice el nombre de la compañera a la que se lanza la pelota.

3.2. Saludos: Nos movemos por toda la sala y suponemos que estamos en una celebración y vamos saludando a todas las de la sala, tenéis que conocer de ellas lo que queráis.

3.3. Parejas: Por parejas vamos a andar por la sala al ritmo de la música.

Después de la orden que dé el TO se hará lo que diga, por ejemplo:

a) MANO CON MANO.

b) BRAZO CON BRAZO.

c) ESPALDA CON ESPALDA.

d) PECHO CON PECHO.

e) FRENTE CON FRENTE.

Tiempo estimado: 20 min.

Nota: Descansar entre los diferentes ejercicios mientras la TO explica la siguiente actividad.

4. **Relajación:** Sentadas en una silla respirar profundamente.

5. **Impresión:** Escribir en un folio las impresiones de esta sesión.

## SESIÓN 3: PSICOMOTRICIDAD ACUÁTICA

### Objetivos:

- Mejorar la resistencia en contra de la gravedad.
- Promover la creación de un grupo y favorecer las relaciones sociales.
- Mejorar la fatiga para la realización de actividades de la vida diaria.
- Mejorar la praxis ideatoria e ideomotora.

**Duración:** 50 minutos

**Lugar:** Piscina

**Material:** Pelotas, churros de colores, colchonetas

Es necesario traer: Toalla, sandalias, gorro y bañador.

Para comenzar la sesión se seguirá un orden establecido de:

**1. Presentación** de lo que vamos a hacer. Además de dar un tiempo de adaptación al medio acuático. Tiempo: 15 minutos

**2. Calentamiento** de todas las articulaciones del cuerpo (desde los tobillos hasta la cabeza). Seremos conscientes de los movimientos de nuestras articulaciones e

iremos pensando en voz baja “estoy moviendo mi tobillo derecho”.

- Carrera ligera por la piscina, para aumentar la resistencia en contra la gravedad (si es necesario es posible el uso de churros para favorecer la seguridad en el medio).

**Tiempo estimado: 15-20 minutos**

**3.** Descanso. 2-3 min

**4.** Ejercicios:

- *Ejercicio 1:* Nos organizamos en círculo usamos la pelota. Pasamos la pelota en dirección de las agujas del reloj y poco a poco vamos añadiendo otra pelota cambiando el sentido hasta llegar a 3 máximos. Tiempo estimado: 10 min

- *Ejercicio 2:* Se propone que hagan un gesto cada una y el resto de participantes deberá adivinar de que actividad se trata. El TO asignara a cada usuaria una acción y deberán ejecutarla a modo mímica para que el resto adivinen que es. ej: Planchar, barrer, servir café, abrir un bote, echar agua con una jarra, vestirse, peinarse, asearse la cara, beber de un vaso, cepillarse los dientes, leer un libro, maquillarse, comer(cortar un filete), cocinar. Tiempo estimado: 25 min

**5.** Relajación mediante respiración y comentar expresiones de la sesión.

|                                  |
|----------------------------------|
| <b>SESIÓN 4: PSICOMOTRICIDAD</b> |
|----------------------------------|

- ✓ Favorecer las relaciones sociales.
- ✓ Mejorar la fatiga para la realización de las actividades de la vida diaria.
- ✓ Contribuir a mejorar la salud, aumentando la calidad de vida.
- ✓ Promover adhesión al tratamiento.

**Duración:** 45 minutos.

**Lugar:** Sala de centro de salud “La Solana”.

**Material:** Sillas.

- **Calentamiento:** Se comienza dando un par de vueltas en la sala, y de vuelta a la silla con música movemos todas las articulaciones del cuerpo (desde los tobillos hasta la cabeza). Seremos conscientes de los movimientos de nuestras articulaciones e iremos pensando en voz baja “estoy moviendo mi tobillo derecho”.

Nota: en función de la gravedad se optara por calentamiento en silla o de pie.

Tiempo estimado: 15 min.

- **Descanso:** 2-3 min

- **Ejercicios:**

3.1. Recordando: Se hace una primera ronda de nombres y posteriormente se reparten folios en las que se escriben los nombres de las compañeras que recordamos su nombre, y por último rellenamos los huecos con otra nueva ronda de nombres.

3.2. Relacionar: Andamos por la zona, y al decir un color se hará una acción, se comenzará con una, y se irán añadiendo acciones para dificultar la actividad.

- a) Rojo = Andar con los brazos levantados.
- b) Verde = Sentarnos en nuestro sitio.
- c) Amarillo = Andar cogidas de la mano.
- d) Azul = Quedarse paradas en el sitio donde están.

Se hará una segunda ronda en la que los colores se corresponderán con otra acción.

- a) Rojo = Sentarnos en nuestro sitio.
- b) Verde = Quedarse paradas en el sitio donde están.
- c) Amarillo = Andar cogidas de la mano.
- d) Azul = Andar con los brazos levantados.

3.3. Fijándonos: continuamos con los colores, al decir un color buscaremos a una compañera que lo lleve en su ropa y nos agarraremos a ella.

3.4. Aconsejando: Nos sentaremos y empezaremos a decir una de las ayudas que utilizamos en nuestro hogar y que nos facilita nuestras vida cotidiana, sirviendo así de consejo para la demás.

Tiempo estimado: 20 min.

Nota: Descansar entre los diferentes ejercicios mientras la TO explica la siguiente actividad.

- **Relajación:** Sentadas en una silla respirar profundamente.
- **Impresión:** En la otra mitad del folio que tenemos escribir en un folio las impresiones de esta sesión, y que os gustaría que se aportara.

|                                                                                      |
|--------------------------------------------------------------------------------------|
| <b>SESIÓN 5: REESTRUCTURACIÓN DEL DESEMPEÑO OCUPACIONAL<br/>Y ACTIVIDAD GRADUADA</b> |
|--------------------------------------------------------------------------------------|

- A lo largo de toda la sesión se van a impartir los contenidos teóricos de las Técnicas de Organización y Administración del Tiempo e Incorporación de actividades agradables (PLANIFICIÓN DEL TIEMPO Y ACTIVIDADES

AGRADABLES. PPT), a través de diversos ejercicios prácticos, bastante dinámicos que ayudarán a la adquisición de los nuevos conocimientos.

- La metodología será en todo momento altamente participativa y bidireccional. Los ejercicios serán elaborados de manera individual pero la puesta en común será grupal.
- Análisis de la actividad agradable y la forma de llevarlo a cabo. Al final de la sesión nuevamente se vuelve a insistir en la importancia de la elaboración de las tareas para casa.
- Al igual que en las anteriores sesiones la metodología se llevará a través de la dinamización por parte del terapeuta incorporando a lo largo de la sesión preguntas abiertas, pequeños debates y la elaboración de los diarios de actividades.

## DESARROLLO DE LA SESIÓN

### Planificación de nuestro tiempo

| TIEMPO | ACTIVIDAD                                                                                                                                                                                                                                                                                                                                         | RECURSOS                                                                                                                                                    | OBJETIVOS                                                                                                                           |
|--------|---------------------------------------------------------------------------------------------------------------------------------------------------------------------------------------------------------------------------------------------------------------------------------------------------------------------------------------------------|-------------------------------------------------------------------------------------------------------------------------------------------------------------|-------------------------------------------------------------------------------------------------------------------------------------|
| 20 MIN | <ul style="list-style-type: none"> <li>• TÉCNICAS DE ORGANIZACIÓN Y ADMINISTRACIÓN DEL TIEMPO</li> </ul> <ol style="list-style-type: none"> <li>1. Ejercicio: Evaluar a qué dedicamos nuestro tiempo.</li> <li>2. Ejercicio: Establecer prioridades.</li> <li>3. Ejercicio: Tormenta de Ideas: Objetivos a corto, medio y largo plazo.</li> </ol> | <p>Papel y lápiz</p> <p>Guía paciente sesión 6</p> <p>Planificación del tiempo y actividades agradables. Ppt</p> <p>Anexo objetivos tabla planificación</p> | <p>- A través de diversos ejercicios Aprender técnicas de organización y administración del tiempo.</p>                             |
| 10 MIN | <ul style="list-style-type: none"> <li>• PRIORIZAMOS TAREAS: CÓMO PROGRAMAR NUESTRO TIEMPO</li> </ul> <ol style="list-style-type: none"> <li>1. Ejercicio: Planificamos Actividades: Urgente/No urgente; Importante/No importante.</li> </ol>                                                                                                     | <p>Planificación del tiempo y actividades agradables. Ppt</p> <p>Anexo objetivos tabla planificación</p> <p>Guía paciente sesión 6</p>                      | <p>- Aprender a discernir de manera grupal entre lo Urgente y lo Importante.</p> <p>-Aprender a programar el tiempo disponible.</p> |
| 5 MIN  | <ul style="list-style-type: none"> <li>• RELACIÓN ENTRE CANSANCIO Y CALIDAD DE LA TAREA</li> </ul>                                                                                                                                                                                                                                                | <p>Planificación del tiempo y actividades agradables. Ppt</p> <p>Guía paciente</p>                                                                          | <p>-Aprender a incorporar períodos de descanso.</p>                                                                                 |



|       |                                                                                                                                                                                                                                                          |                                                                                                      |                                                                                                                         |
|-------|----------------------------------------------------------------------------------------------------------------------------------------------------------------------------------------------------------------------------------------------------------|------------------------------------------------------------------------------------------------------|-------------------------------------------------------------------------------------------------------------------------|
|       |                                                                                                                                                                                                                                                          | sesión 6                                                                                             |                                                                                                                         |
| 5 MIN | <ul style="list-style-type: none"> <li>TAREAS PARA CASA:                             <ol style="list-style-type: none"> <li>Diario de Actividades II: Incluyendo descansos</li> <li>Revisar el establecer objetivos y prioridades</li> </ol> </li> </ul> | Anexo diario de actividades<br><br>Anexo objetivos tabla planificación<br><br>Guía paciente sesión 6 | -Reforzar lo aprendido durante la sesión.<br><br>-Motivar para la elaboración de las tareas para casa y su importancia. |

### **Actividades agradables**

| TIEMPO | ACTIVIDAD                                                                                                                                                      | RECURSOS                                                                                                       | OBJETIVOS                                                                                                                                                                                                                                        |
|--------|----------------------------------------------------------------------------------------------------------------------------------------------------------------|----------------------------------------------------------------------------------------------------------------|--------------------------------------------------------------------------------------------------------------------------------------------------------------------------------------------------------------------------------------------------|
| 10 MIN | <ul style="list-style-type: none"> <li>SOBRE ACTIVIDADES AGRADABLES</li> </ul>                                                                                 | Planificación del tiempo y actividades agradables. ppt                                                         |                                                                                                                                                                                                                                                  |
| 10 MIN | <ul style="list-style-type: none"> <li>ANÁLISIS DE ACTIVIDADES AGRADABLES: ANÁLISIS DE TUS ACTIVIDADES AGRADABLES MI CALENDARIO COMPROMISO PERSONAL</li> </ul> | Papel y bolígrafo<br><br>Planificación del tiempo y actividades agradables<br><br>Anexo actividades agradables | -Analizar actividades agradables pasadas, presentes y futuras.<br>-Comprobar qué nivel de dificultad tiene el realizarlas y la satisfacción que puede producir el volver a realizarlas.<br>-Conocer diversos ejemplos de actividades agradables. |
| 10 MIN | <ul style="list-style-type: none"> <li>TAREAS PARA CASA: INCORPORACIÓN DE ACTIVIDADES AGRADABLES AL DIARIO.</li> </ul>                                         | Anexo diario de actividades                                                                                    | -Reforzar lo aprendido durante la sesión.<br><br>-Motivar para la elaboración de las tareas para casa y su importancia.                                                                                                                          |

### **Relajación**

| TIEMPO | ACTIVIDAD | RECURSOS | OBJETIVOS |
|--------|-----------|----------|-----------|
|--------|-----------|----------|-----------|

|        |              |               |  |
|--------|--------------|---------------|--|
| O      |              |               |  |
| 15 MIN | • RELAJACIÓN | CD relajación |  |

## TAREAS PARA CASA

Dentro de estas tareas se encuentran el diario de actividades. A diferencia de otras sesiones integrarán en el mismo, y por tanto en su actividad diaria, descansos y actividades agradables.

Con ello, experimentarán los nuevos conceptos del rendimiento y la fatiga. Haremos hincapié en la finalidad de su incorporación y del registro de los mismos:

- Aprenderán que trabajan bajo menos cansancio si aprovechan las mejores horas de la jornada de mayor rendimiento e incluyen periodos de descanso dentro de la actividad.

Harán la lista de actividades agradables presentes, pasadas y futuras y su relación entre grado de satisfacción y dificultad:

- El *primer paso* para aumentar y recuperar el número de actividades agradables que hacían antes de su problema actual, es saber con exactitud de qué actividades estamos hablando.

Incluirán estas actividades agradables a su rutina diaria y disminuirán la incapacidad para sentir placer ante estas actividades:

- Existe una relación causal y directa entre el número de actividades agradables que realizan y la calidad de su estado de ánimo. Esta relación es tan evidente como para notar los efectos día a día.

También revisaran los objetivos y la planificación de actividades para comprobar que está adaptado a sus necesidades y características:

- Esto es la base para comprender que una buena planificación y horario disciplinado es una de las claves para obtener un resultado excelente.

A continuación tiene Ud. el Diario de Actividades. Por favor, rellénelo con las horas y actividades que realiza a lo largo del día.

**Nombre y Apellidos**

**Día de la semana:**

| Hora | Actividad |
|------|-----------|
|------|-----------|

|  |  |
|--|--|
|  |  |
|  |  |
|  |  |
|  |  |
|  |  |

| ACTIVIDADES AGRADABLES PASADAS                                                                           | ACTIVIDADES AGRADABLES PRESENTES                                                                   | ACTIVIDADES AGRADABLES FUTURAS                                                                                          |
|----------------------------------------------------------------------------------------------------------|----------------------------------------------------------------------------------------------------|-------------------------------------------------------------------------------------------------------------------------|
| <b>Actividades agradables que hacías antes y que dejaste de hacer a consecuencia del problema actual</b> | Actividades agradables que <b><i>hacías y que todavía sigues haciendo</i></b> de forma esporádica. | Actividades agradables que <b><i>nunca hiciste</i></b> anteriormente, pero crees que si las hicieras te podrían gustar. |

|                                         | Dificultad realización | Nivel de satisfacción que me produce |
|-----------------------------------------|------------------------|--------------------------------------|
| <b>Actividades agradables pasadas</b>   |                        |                                      |
| <b>Actividades Agradables presentes</b> |                        |                                      |
| <b>Actividades agradables futuras</b>   |                        |                                      |

## SESIÓN 6: ACTIVIDADES VIDA DIARIA

**MATE  
RIAL  
NECE  
SARIO**

### OBJETIVOS

- Reforzar positivamente la realización de las tareas para casa.
- Controlar que las tareas se hayan realizado adecuadamente.

➤ P

- Reforzar lo aprendido durante la sesión
- Motivar la elaboración de las tareas para casa y su importancia

## sentación: Higiene Postural y Actividad física

### DESARROLLO DE LA SESIÓN

#### Introducción

Dentro de las actividades de la vida diaria diferenciaremos entre las básicas y las instrumentales:

Las actividades básicas de la vida diaria son definidas como aquellas actividades orientadas hacia el cuidado del propio cuerpo: bañarse, ducharse, control de esfínteres, arreglarse, masticar y tragar, comer, movilidad funcional, dispositivos para el cuidado personal, higiene personal y acicalado, actividad sexual, sueño/descanso, higiene en el inodoro.

Las actividades instrumentales de la vida diaria son las orientadas a interactuar con el entorno, que son a menudo complejas y generalmente opcionales por naturaleza: cuidado de otros, cuidado de animales domésticos y mascotas, criar a los niños, uso de dispositivos de comunicación, movilidad en la comunidad, gestiones financieras, control y mantenimiento de la salud, establecimiento y manejo del hogar, preparación de menús y limpieza, procedimientos de seguridad y respuesta de emergencia, compras.

Hemos abarcado varias actividades de la vida diaria, disponiendo diversas recomendaciones que el individuo usará o considerará adaptándolas a su caso. Se intenta disponer un amplio abanico de posibilidades para que consigamos la mayor utilidad para cada uno de los integrantes del grupo.

|                                              |
|----------------------------------------------|
| <b>ACTIVIDADES BÁSICAS DE LA VIDA DIARIA</b> |
|----------------------------------------------|

#### **MOVILIDAD FUNCIONAL**

Una de las actividades básicas de la vida diaria, es la movilidad. Se entiende que la movilidad es una destreza básica para otras actividades del cuidado personal e instrumentales. Antes de la movilidad funcional es preciso mantener un buen control postural, que es la capacidad y habilidad del individuo para permanecer en la postura idónea o deseada para realizar una determinada tarea o actividad. Habitualmente es un control inconsciente y una actividad que está automatizada. Este aprendizaje lo abordaremos en esta sesión y las distintas actividades de la vida diaria y en la sesión “Higiene postural”.

Un aspecto a insistir en el paciente es que no interrumpa el uso de estas recomendaciones o pautas cuando se encuentre mejor, sino que las debe integrar en su rutina diaria de manera constante.

#### **ASEO**

- **El baño**

Si el paciente tiene dificultades debidas a una limitación en la movilidad o tiene riesgo de caída es recomendable utilizar **barras de apoyo fijas** para salir de la bañera, colocar una **alfombrilla o pegatinas antideslizantes**.

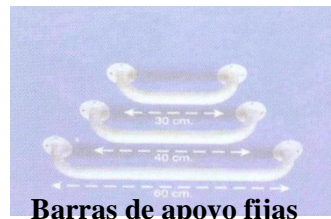

y entrar

En este caso también, es mejor lavarse la parte inferior estando sentado. La mejor solución para evitar estos problemas es **eliminar la bañera y sustituirla por plato de ducha**.

También hay otras alternativas como las silla giratoria para baño, tabla... En estos casos la primera recomendación es consultar con un Terapeuta Ocupacional para que le pueda asesorar.

#### **h) Cepillado de dientes:**

Sentado, se hacen movimientos de flexoextensión de hombro y de codo evitando los movimientos a nivel de muñeca (articulación más frágil que las anteriores).

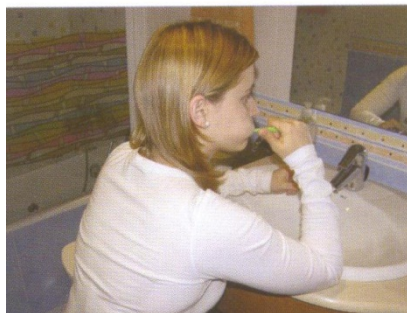

cara o  
en vez  
  
que

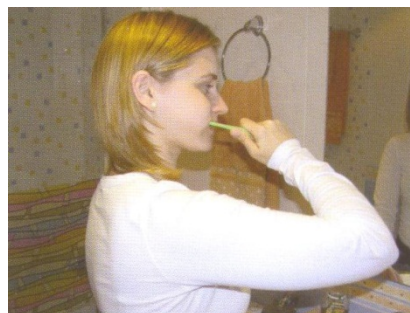

Quando se lave la  
los dientes de pie,  
de flexionar la  
columna  
agachándose hay  
mantener la  
espalda recta y las

rodillas en flexión.

Usar un cepillo eléctrico

- **Cortarse las uñas de los pies:**

Sentado y el pie apoyado en una superficie más alta, evitando la máxima flexión de

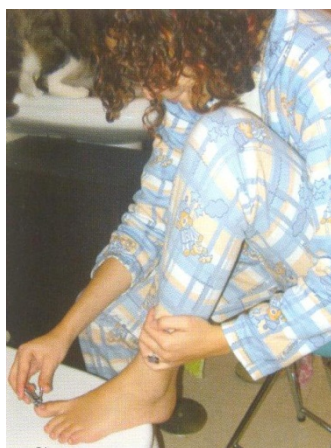

**Gesto recomendado**

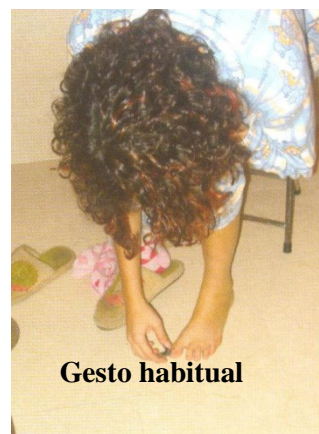

**Gesto habitual**

cadera.

- **Secar pelo, uso del secador:**

Realizar la tarea sentado, y/o apoyando el codo sobre el lavabo para bloquear la acción del hombro.

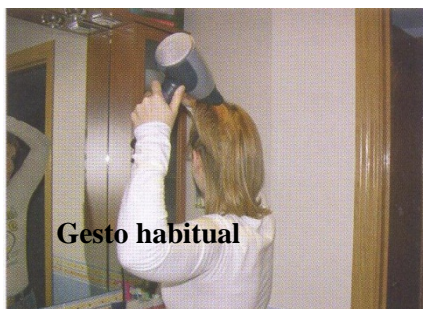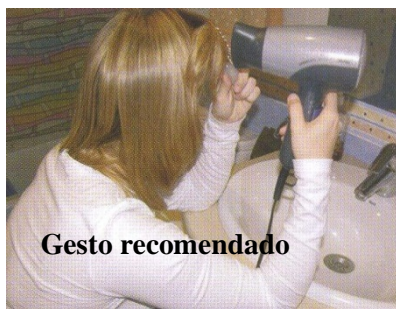

El uso

de un secador

ligero o de tubo extraíble y dirigible que disminuye el peso a soportar por las articulaciones.

## **VESTIDO**

Para disminuir la probabilidad de aparición de dolor o un incremento del mismo, se recomendará que si es necesario se vistan sentados, eviten forzar las articulaciones y ropa de gran peso y la realización de movimientos gruesos.

- **Atarse los cordones:**

Subir la pierna en una banqueta pequeña para mejorar el acceso a la zapatilla.

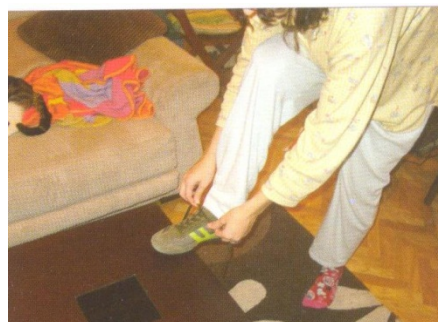

- **Coger ropa del armario**

1. Coger la ropa con ambas manos y elevar la percha, procurando evitar la desviación de las manos.
2. Barra horizontal a la altura adecuada para evitar dolor.
3. Colocar una prenda por percha. Perchas ligeras antideslizantes.
4. No cargar excesivamente los armarios de prendas para hacer movimientos con menos resistencia.
5. Colocar barras extraíbles de carga frontal.

- **Poner sujetador**

- Atar el sujetador en la parte anterior.
- Girarlo deslizándolo por el tronco.
- Colocar los tirantes.
- Abrocharlo y ponerlo posteriormente como si fuera una camiseta.
- Podemos sustituir el sujetador por uno con cierres delanteros, con cremallera o deportivo sin cierre.

## ACTIVIDADES INSTRUMENTALES DE LA VIDA DIARIA

### RECOMENDACIONES DE REPASO Y OTRAS NUEVAS A APLICAR

1. Organizar y simplificar el trabajo omitiendo los pasos innecesarios. Para ayudarte a determinarlo responde a las siguientes preguntas:
  - ¿Por qué es necesario?
  - ¿Cuánto coste energético tiene esa tarea?
  - ¿Qué pasa si la tarea no es realizada?
  - Ejemplos:
    - Remojar los platos para eliminar la necesidad de frotar.
    - Permitir que los platos se sequen solos.
    - Usar sábanas que se ajustan para facilitar la hora de hacer las camas.
    - Planchar selectivamente: las toallas y las sábanas no necesitan plancharse.
2. Planifica con antelación: Prioriza y planifica las actividades, alterna entre tareas más pesadas y ligeras, e intercala periodos de descanso. Cuando planifiques hazte las siguientes preguntas:
  - ¿Cómo voy a hacer esta actividad?
  - ¿Cuándo es el mejor momento para hacer esta actividad?
  - ¿Puede dividirse esta actividad en pasos más pequeños, asequibles?
  - ¿Se pueden repartir las tareas entre los miembros del hogar?
3. Organiza el espacio para almacenar: Planifica y organiza los espacios de trabajo eliminando pasos innecesarios, ahorrarás tiempo y energía y reducirás la fatiga. Por ejemplo: Duplica los artículos que sean necesarios cerca de cada área de trabajo (unas tijeras, o un paquete de pañuelos)
4. Siéntate para trabajar: Estar sentado exige menos requerimientos de energía que estar de pie. Muchas actividades pueden hacerse sentado en vez de pie, como cortar verduras o planchar.
5. Cambiar la posición con frecuencia, tanto cuando se está trabajando como en reposo. Por ejemplo, si estamos sentados nos levantaremos cada 20 minutos para evitar contracturas.
6. Utilizar las articulaciones más fuertes y los músculos más largos. Por ejemplo:
  - Flexionar las rodillas y la cadera para levantar algún objeto.
  - Utilizar los hombros y caderas suavemente para abrir puertas.
  - Es preferible utilizar las articulaciones del codo y la mano en vez de las de los



dedos.

- Utilizar los pies para cerrar cajones
- Llevar el bolso cruzado o sobre el antebrazo, así como otros objetos
- Evitar coger objetos pequeños o que requieran una fuerte agarre.
- Empujar los objetos en vez de sostenerlos o cargar con ellos.
- Repartir el peso y utilizar las dos manos para trabajar, coger y trasladar objetos, realizando movimientos rítmicos y suaves.
- Para realizar actividades como abrir frascos o limpiar superficies alternar las manos o utilizar las dos para aumentar la fuerza.
- Utilizar las palmas de las manos en lugar de los dedos.
- Transportar los objetos pesados en un carrito, tanto en casa como en la calle.

## COCINA

- Elimina el desorden, quita los artículos que sean innecesarios y de uso poco frecuente de estantes y muebles altos.
- Coloca los alimentos y las cacerolas cerca del área de trabajo.
- No se deben sujetar ollas pesadas, es mejor arrastrarlas.
- Es recomendable sustituir los materiales e instrumentos de la cocina por objetos más ligeros y aprender a cogerlos con las dos manos. En el caso de objetos a temperatura ambiental, simplemente utilizando la mano no dominante como mano de apoyo y sostén inferior, y en la parte superior la mano dominante
- Los objetos ligeros y que no uses de manera habitual, deberás almacenarlos por encima del hombro.
- Los objetos pesados y que no uses mucho deberás almacenarlos en el espacio que queda entre la cadera y el suelo.
- Los objetos más pesados, como las ollas, deben alcanzarse fácilmente.
- El levantamiento de objetos pesados con la muñeca flexionada favorece el dolor, y en el peor de los casos, la subluxación anterior de la articulación
- Utilice un banquillo estable para alcanzar repisas más altas.
- Algunas tareas de la actividad de cocina pueden realizarse en sedestación con el fin de evitar la fatiga y el dolor
- Deberemos evitar los giros y el levantamiento de los brazos por encima de la

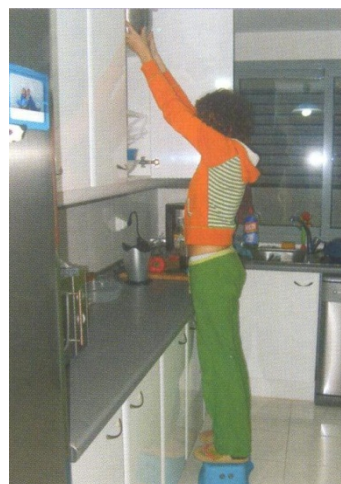



cabeza o por debajo de la cintura, para mantener el centro de gravedad alineado y sin desplazamientos bruscos.

- Algunas ayudas técnicas:

- Abrir botes: soporte que permite fijar el bote a una superficie y facilita la apertura de los botes con una sola mano y/o usando las dos manos

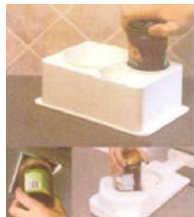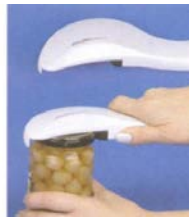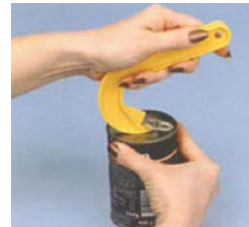

- Abrir latas: sustituir el abrelatas convencional por uno adaptado que minimice la lesión articular.
- Se adquieren en ferreterías, grandes comercios, ortopedias

## COMPRAS

- Evitar usar las bolsas a favor del carrito. Este debe ser un carro preparado para llevarlo por delante de nuestro cuerpo.
- Si se llevan bolsas: evitar mantener el peso durante mucho tiempo, llevar la carga en el antebrazo y pegado al cuerpo, utilizar asa de plástico engrosadas para bolsas de tipo camiseta.
- Ayuda técnica: coge bolsas de compra en ortopedias.

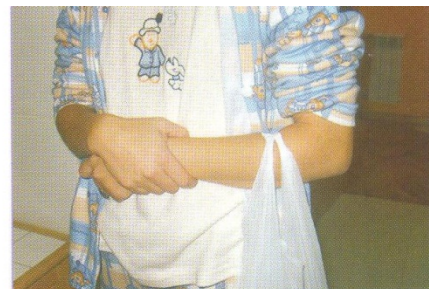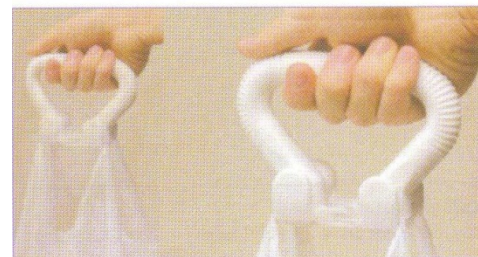

## PLANCHAR

- Realizar la actividad sentado
- Realizar la actividad de pie usando una banqueta para no sobrecargar la espalda.
- Usar una plancha lo más ligera posible y productos que faciliten el planchado de la ropa.
- Es imprescindible que la tabla de planchar esté a una altura adecuada para evitar el dolor: entre cintura y la cadera.

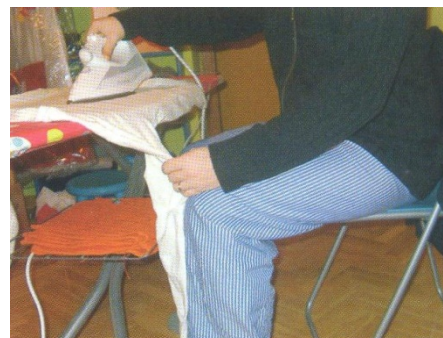

## ACTIVIDADES DE OCIO Y TIEMPO LIBRE

- **Actividad física:** El objetivo es incentivar al paciente para el desarrollo de actividad física en el tiempo de ocio.

Al hacer cualquier ejercicio hay que tener en cuenta que:

|                                                                                                                                                                                                                      |                                                                                       |
|----------------------------------------------------------------------------------------------------------------------------------------------------------------------------------------------------------------------|---------------------------------------------------------------------------------------|
| HACER EJERCICIO, AUNQUE PROVOQUE FATIGA, NUNCA DEBE PROVOCAR DOLOR.                                                                                                                                                  |    |
| LOS EJERCICIOS SIEMPRE SE DEBEN REALIZAR EN UNA POSTURA ADECUADA, SOBRE TODO DE ESPALDA                                                                                                                              |    |
| ES CONVENIENTE HACER PAUSAS ENTRE EJERCICIOS PARA EVITAR EL AGOTAMIENTO                                                                                                                                              |   |
| HAY QUE LLEVAR EL CONTROL DE LA RESPIRACIÓN                                                                                                                                                                          |  |
| SE DEBEN EVITAR MOVIMIENTOS EXTREMOS DE LAS ARTICULACIONES COMO LA COLUMNA, SOBRE TODO LOS QUE HACEN ENCORVAR LA ESPALDA. POR TANTO NO SE HARÁN ESFUERZOS COMO LEVANTAR Y TRANSPORTAR PESO CON LA ESPALDA ENCORVADA. |                                                                                       |

Si debido a los síntomas dolorosos o fatiga disminuimos mucho la actividad física, nuestra capacidad física y condición física iría disminuyendo y estos síntomas dolorosos y de cansancio aparecerían progresivamente con actividades cada vez más livianas llevándonos a una progresiva pérdida de autonomía personal y otras enfermedades por desuso o desentrenamiento muscular, nervioso coordinativo y cardiovascular.

Esta prevención puede realizarse con ejercicio físico que es la realización de actividad física de forma regular o habitual, al menos tres días a la semana.

El Ejercicio físico moderado ha mostrado que ayuda a disponer de una mejor calidad de sueño, y si se vuelve a dormir mejor una parte de síntomas de dolor y cansancio se reducen.

Según los estudios la práctica de actividad física en agua caliente mejora y previene le

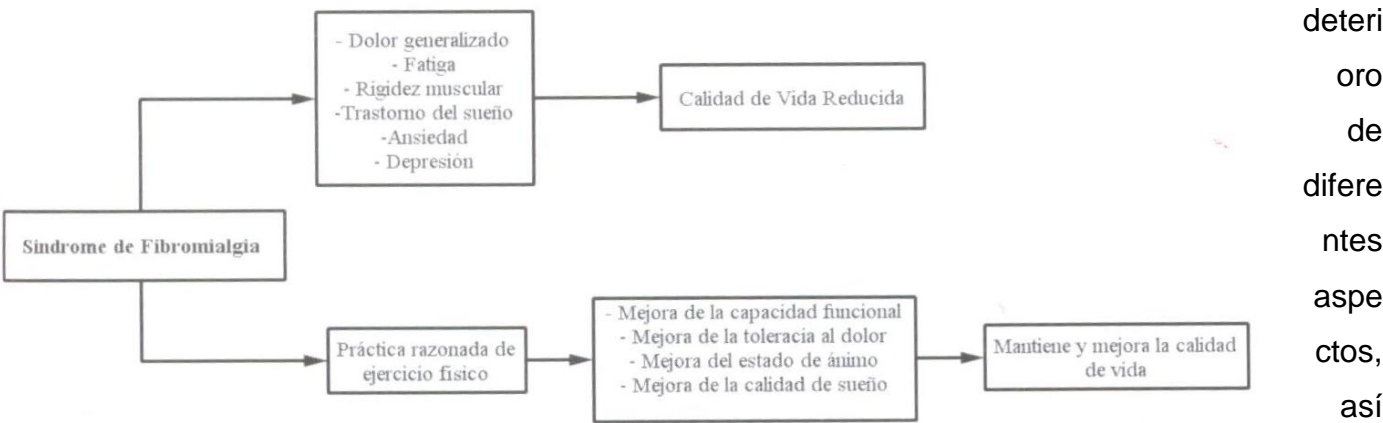

como en la sala de actividad física en seco.

La práctica razonada de ejercicio además de mejorar la capacidad funcional del paciente mejora también la tolerancia al dolor y el estado de ánimo.

Efectos en la actividad física adecuada en personas con fibromialgia:

| CAPACIDAD FÍSICA                                                     |
|----------------------------------------------------------------------|
| Mejoras de la capacidad funcional como la resistencia cardiovascular |
| Incremento de la fuerza muscular.                                    |
| Mejoras de la movilidad articular y de la flexibilidad.              |
| Mejoras en el equilibrio y en el control postural.                   |
| ASPECTOS PSICOLÓGICOS                                                |
| Reducción de los trastornos como la ansiedad y depresión             |
| Mejoras del estado de ánimo y salud mental.                          |
| SÍNTOMAS ESPECÍFICOS.                                                |
| Disminución de la rigidez muscular                                   |
| Reducción del dolor corporal.                                        |
| Disminución de astenia y fatiga.                                     |
| Mejoras en la calidad del sueño.                                     |

Entre los ejercicios apropiados para personas con fibromialgia se puede incluir aquellos

con pesas livianas, aerobio suave, flexibilidad-yoga moderados para evitar las tensiones dolorosas que pueden generarse durante las elongaciones musculares en los límites de los estiramientos.

- **Cuando estamos de viaje**

**En nuestro propio coche:**

- Utilizar maleta con ruedas a ambos lados de la base que permita trasladarla a un lado de nuestro cuerpo, a nuestra misma altura.
- Prevenir el dolor tomando los medicamentos que haya prescrito el facultativo antes de iniciar el viaje.
- Practicar ejercicios de relajación y respiración que ayuden a eliminar la tensión acumulada.
- La posición del asiento debe permitir que las rodillas queden en un plano más alto que las caderas y con una ligera flexión de 20° a 25°, para no sobrecargar la espalda
- Colocar una almohadilla en la zona lumbar para dar un plano de soporte adecuado a esta zona
- Apoyar la cabeza sobre el reposacabezas del asiento.
- Es aconsejable descansar cada 100 km para relajar los músculos y aliviar las tensiones generales.

**En el uso del transporte público:**

Tanto en autobuses trenes ya aviones, la mayor dificultad se presenta ante la incomodidad del asiento y el dolor que puede presentarse al mantener una postura incómoda durante horas.

- Elegir asientos que dispongan de más espacio (acceso a puertas, frente a descansillos, etc) aumenta la comodidad.
- El tren es el transporte público que más facilita la posibilidad de realizar pequeños desplazamientos que contrarrestan el efecto de períodos prolongados de inmovilización. Por ello, el tren es el medio de transporte de elección antes que el autobús y el coche.
- Realizar pequeños movimientos en el mismo asiento, o de pie sujetándose al asiento anterior puede ser útil para combatir el dolor.

**TAREAS PARA CASA**

Deben registrar que posturas inadecuadas adoptan o adoptaban durante la realización de las actividades de la vida diaria de manera que las hagan conscientes y utilicen los conocimientos aprendidos para cambiarlas.

## **SESIÓN 7: EJERCICIO AIRE LIBRE**

Se realiza ejercicio al aire libre:

La sesión consiste en realizar un paseo de 40 minutos a ritmo agradable.

En la sesión se incentiva la cascada de ideas siempre con tendencia positiva hacia mejora de enfermedad y sintomatología.

Se incentiva a realizar paseos periódicos como parte de la terapia.
